# Supplementary material
Source: publisher figshare collection journal article supplement (https://acs.figshare.com/ndownloader/files/3850612)
Supplement: Supplementary file 1 [file 3850612]

 
data_5f
 
_audit_creation_method            SHELXL-97 
_chemical_name_systematic 
; 
 ? 
; 
_chemical_name_common             ? 
_chemical_melting_point           ? 
_chemical_formula_moiety          ? 
_chemical_formula_sum 
 'C23 H34 N2 O4' 
_chemical_formula_weight          402.52 
_chemical_absolute_configuration  syn
 
loop_ 
 _atom_type_symbol 
 _atom_type_description 
 _atom_type_scat_dispersion_real 
 _atom_type_scat_dispersion_imag 
 _atom_type_scat_source 
 'C'  'C'   0.0033   0.0016 
 'International Tables Vol C Tables 4.2.6.8 and 6.1.1.4' 
 'H'  'H'   0.0000   0.0000 
 'International Tables Vol C Tables 4.2.6.8 and 6.1.1.4' 
 'N'  'N'   0.0061   0.0033 
 'International Tables Vol C Tables 4.2.6.8 and 6.1.1.4' 
 'O'  'O'   0.0106   0.0060 
 'International Tables Vol C Tables 4.2.6.8 and 6.1.1.4' 
 
_symmetry_cell_setting            Monoclinic 
_symmetry_space_group_name_H-M    P21
 
loop_ 
 _symmetry_equiv_pos_as_xyz 
 'x, y, z' 
 '-x, y+1/2, -z' 
 
_cell_length_a                    7.9977(16) 
_cell_length_b                    9.4736(18) 
_cell_length_c                    15.462(3) 
_cell_angle_alpha                 90.00 
_cell_angle_beta                  101.002(4) 
_cell_angle_gamma                 90.00 
_cell_volume                      1150.0(4) 
_cell_formula_units_Z             2 
_cell_measurement_temperature     173(2) 
_cell_measurement_reflns_used     8237 
_cell_measurement_theta_min       1.34
_cell_measurement_theta_max       27.10
 
_exptl_crystal_description        block 
_exptl_crystal_colour             colourless
_exptl_crystal_size_max           0.35 
_exptl_crystal_size_mid           0.33 
_exptl_crystal_size_min           0.12 
_exptl_crystal_density_diffrn     1.162 
_exptl_crystal_density_method     'not measured' 
_exptl_crystal_F_000              436 
_exptl_absorpt_coefficient_mu     0.079 
_exptl_absorpt_correction_type    multi-scan 
_exptl_absorpt_correction_T_min   0.875 
_exptl_absorpt_correction_T_max   1.00 
_exptl_absorpt_process_details    'SADABS (Sheldrick, 1997)'  

_exptl_special_details 
; 
 ? 
; 
 
_diffrn_ambient_temperature       173(2) 
_diffrn_radiation_wavelength      0.71073 
_diffrn_radiation_type            MoK\a 
_diffrn_radiation_source          'fine-focus sealed tube' 
_diffrn_radiation_monochromator   graphite 
_diffrn_measurement_device_type   'Bruker Kappa Duo Apex II Diffractometer'
_diffrn_measurement_method        '0.5\% \f scans and \w scans' 
_diffrn_standards_number          0 
_diffrn_standards_interval_count  0
_diffrn_standards_interval_time   0
_diffrn_standards_decay_%         0
_diffrn_reflns_number             8237 
_diffrn_reflns_av_R_equivalents   0.0215 
_diffrn_reflns_av_sigmaI/netI     0.0353 
_diffrn_reflns_limit_h_min        -10 
_diffrn_reflns_limit_h_max        9 
_diffrn_reflns_limit_k_min        -12 
_diffrn_reflns_limit_k_max        12 
_diffrn_reflns_limit_l_min        -19 
_diffrn_reflns_limit_l_max        19 
_diffrn_reflns_theta_min          1.34 
_diffrn_reflns_theta_max          27.10 
_reflns_number_total              5006 
_reflns_number_gt                 4402 
_reflns_threshold_expression      >2sigma(I) 
 
_computing_data_collection  'SAINT (7.60a, Bruker AXS Inc., Madison, WI, USA, 2006)'
_computing_cell_refinement  'SAINT (7.60a, Bruker AXS Inc., Madison, WI, USA, 2006)'
_computing_data_reduction   'SAINT (7.60a, Bruker AXS Inc., Madison, WI, USA, 2006)'
_computing_structure_solution  'SHELXS-97 (Sheldrick, 1997)' 
_computing_structure_refinement 'SHELXL-97 (Sheldrick, 1997)' 
_computing_molecular_graphics   'X-Seed (Barbour, 2001)'
_computing_publication_material 'SHELXL-97 (Sheldrick, 2001)'  
 
_refine_special_details 
; 
 Refinement of F^2^ against ALL reflections.  The weighted R-factor wR and 
 goodness of fit S are based on F^2^, conventional R-factors R are based 
 on F, with F set to zero for negative F^2^. The threshold expression of 
 F^2^ > 2sigma(F^2^) is used only for calculating R-factors(gt) etc. and is 
 not relevant to the choice of reflections for refinement.  R-factors based 
 on F^2^ are statistically about twice as large as those based on F, and R- 
 factors based on ALL data will be even larger. 
; 
 
_refine_ls_structure_factor_coef  Fsqd  
_refine_ls_matrix_type            full 
_refine_ls_weighting_scheme       calc  
_refine_ls_weighting_details 
 'calc w=1/[\s^2^(Fo^2^)+(0.0736P)^2^+0.0984P] where P=(Fo^2^+2Fc^2^)/3' 
_atom_sites_solution_primary      direct 
_atom_sites_solution_secondary    difmap 
_atom_sites_solution_hydrogens    geom 
_refine_ls_hydrogen_treatment     constr 
_refine_ls_extinction_method      SHELXL 
_refine_ls_extinction_coef        0.009(3) 
_refine_ls_extinction_expression 
 'Fc^*^=kFc[1+0.001xFc^2^\l^3^/sin(2\q)]^-1/4^' 
_refine_ls_abs_structure_details 
 'Flack H D (1983), Acta Cryst. A39, 876-881' 
_refine_ls_abs_structure_Flack    1.9(10) 
_refine_ls_number_reflns          5006 
_refine_ls_number_parameters      308 
_refine_ls_number_restraints      1 
_refine_ls_R_factor_all           0.0535 
_refine_ls_R_factor_gt            0.0461 
_refine_ls_wR_factor_ref          0.1253 
_refine_ls_wR_factor_gt           0.1195 
_refine_ls_goodness_of_fit_ref    1.040 
_refine_ls_restrained_S_all       1.040 
_refine_ls_shift/su_max           0.000 
_refine_ls_shift/su_mean          0.000
 
_iucr_refine_instructions_details
;
TITL tbp32 in P2(1)
CELL 0.71073 7.9977 9.4736 15.4624 90.000 101.002 90.000
ZERR 2.0000 0.0016 0.0018 0.0030 0.000 0.004 0.000
LATT -1
SYMM -X, 0.5+Y, -Z
SFAC C H N O
UNIT 46 68 4 8
MERG 2
FMAP 2
GRID
PLAN 5
TEMP -100
SIZE 0.12 0.33 0.35
EXYZ C5A C5B
EADP C5A C5B
EXYZ C9A C9B
EADP C9A C9B
CONF
BOND $H
OMIT 1 0 1
OMIT 0 0 2
L.S. 12
ACTA
WGHT    0.073600    0.098400
EXTI    0.008739
FVAR       0.39855   0.77661   0.51567
O1    4    0.188460    0.815469    0.146288    11.00000    0.05345    0.03532 =
         0.02789    0.00365   -0.00383   -0.00122
O2    4    0.026426    0.696910    0.034453    11.00000    0.06095    0.05150 =
         0.02830   -0.00291   -0.00568    0.00092
O3    4    0.294421    0.583842    0.319866    11.00000    0.04645    0.04535 =
         0.03133   -0.00026   -0.00348    0.01350
O4    4   -0.160078    0.762835    0.179744    11.00000    0.04085    0.07653 =
         0.04812   -0.00796   -0.00908    0.01551
N1    3    0.040465    0.690073    0.302470    11.00000    0.03330    0.03534 =
         0.02789   -0.00392    0.00369   -0.00127
N2    3   -0.195820    0.794197    0.323115    11.00000    0.03016    0.07521 =
         0.06241   -0.02257    0.01005    0.00089
C1    1    0.275347    1.055478    0.141762    11.00000    0.10430    0.04398 =
         0.05442    0.00972    0.00486   -0.01363
AFIX 137
H1A   2    0.232258    1.072439    0.196078    11.00000   -1.50000
H1B   2    0.264841    1.142064    0.106458    11.00000   -1.50000
H1C   2    0.395347    1.027391    0.156557    11.00000   -1.50000
AFIX   0
C2    1    0.174409    0.940774    0.090374    11.00000    0.07662    0.04076 =
         0.03578    0.01182   -0.00060    0.00070
AFIX  23
H2A   2    0.053644    0.969550    0.073079    11.00000   -1.20000
H2B   2    0.219240    0.920647    0.036239    11.00000   -1.20000
AFIX   0
C3    1    0.103411    0.701526    0.109084    11.00000    0.04217    0.03922 =
         0.02646   -0.00241    0.00091    0.00358
C4    1    0.135899    0.574872    0.171066    11.00000    0.04041    0.03419 =
         0.02773   -0.00398    0.00312   -0.00053
C8    1   -0.013249    0.468699    0.151767    11.00000    0.05862    0.04610 =
         0.04034   -0.01589    0.00775   -0.01404
AFIX  23
H8A   2   -0.121371    0.521750    0.146503    11.00000   -1.20000
H8B   2   -0.012394    0.423881    0.094015    11.00000   -1.20000
AFIX   0
C12   1    0.166110    0.619256    0.268578    11.00000    0.03445    0.02713 =
         0.02943   -0.00091    0.00300    0.00083
C13   1   -0.113183    0.750831    0.259137    11.00000    0.03116    0.04696 =
         0.04867   -0.01299    0.00171    0.00115
C14   1   -0.376758    0.832188    0.301156    11.00000    0.03585    0.14628 =
         0.10589   -0.04104    0.01015    0.01783
AFIX 137
H14A  2   -0.410715    0.844251    0.237264    11.00000   -1.50000
H14B  2   -0.395431    0.920670    0.330748    11.00000   -1.50000
H14C  2   -0.445020    0.757028    0.320783    11.00000   -1.50000
AFIX   0
C15   1   -0.119624    0.741359    0.409682    11.00000    0.04640    0.05694 =
         0.05132   -0.02024    0.02247   -0.02255
AFIX  13
H15   2   -0.175914    0.650283    0.420001    11.00000   -1.20000
AFIX   0
C16   1   -0.136712    0.843608    0.483346    11.00000    0.05454    0.08360 =
         0.07224   -0.03870    0.03427   -0.02092
AFIX 137
H16A  2   -0.086367    0.934661    0.472460    11.00000   -1.50000
H16B  2   -0.077281    0.805322    0.539772    11.00000   -1.50000
H16C  2   -0.257496    0.856718    0.485266    11.00000   -1.50000
AFIX   0
C17   1    0.064726    0.710342    0.398197    11.00000    0.04684    0.03227 =
         0.02974   -0.00371    0.01102   -0.00709
AFIX  13
H17   2    0.103322    0.619378    0.428323    11.00000   -1.20000
AFIX   0
C18   1    0.193449    0.824829    0.432008    11.00000    0.03080    0.03435 =
         0.02728   -0.00560    0.00666   -0.00052
C19   1    0.221092    0.939734    0.380942    11.00000    0.03504    0.04037 =
         0.02950   -0.00179    0.00597   -0.00369
AFIX  43
H19   2    0.160821    0.947059    0.321906    11.00000   -1.20000
AFIX   0
C20   1    0.336571    1.044235    0.415732    11.00000    0.04047    0.04026 =
         0.04509   -0.00385    0.01329   -0.00975
AFIX  43
H20   2    0.353658    1.123167    0.380530    11.00000   -1.20000
AFIX   0
C21   1    0.426776    1.034108    0.501242    11.00000    0.03180    0.04803 =
         0.04826   -0.01705    0.00718   -0.00976
AFIX  43
H21   2    0.506440    1.105288    0.524498    11.00000   -1.20000
AFIX   0
C22   1    0.400461    0.919929    0.552697    11.00000    0.03818    0.05276 =
         0.03553   -0.01154    0.00049    0.00342
AFIX  43
H22   2    0.461713    0.912714    0.611546    11.00000   -1.20000
AFIX   0
C23   1    0.285014    0.816293    0.518489    11.00000    0.04601    0.03764 =
         0.02886    0.00057    0.00432    0.00383
AFIX  43
H23   2    0.267576    0.738121    0.554218    11.00000   -1.20000
PART 1
AFIX   0
C5A   1    0.305152    0.505887    0.154460    21.00000    0.05796    0.04245 =
         0.04482   -0.00064    0.01617    0.01252
AFIX  23
H5A1  2    0.399633    0.572550    0.175189    21.00000   -1.20000
H5A2  2    0.326999    0.420065    0.191422    21.00000   -1.20000
AFIX   0
C6A   1    0.311156    0.466460    0.063420    21.00000    0.07121    0.06413 =
         0.04085    0.00160    0.01485    0.03082
AFIX  23
H6A1  2    0.324465    0.362571    0.063252    21.00000   -1.20000
H6A2  2    0.196661    0.486919    0.028393    21.00000   -1.20000
AFIX   0
C7A   1    0.420792    0.517126    0.018175    21.00000    0.12942    0.14820 =
         0.06777    0.02260    0.05809    0.05165
AFIX 137
H7A1  2    0.441790    0.617038    0.032740    21.00000   -1.50000
H7A2  2    0.374465    0.507616   -0.044962    21.00000   -1.50000
H7A3  2    0.527977    0.464552    0.032967    21.00000   -1.50000
AFIX   0
C9A   1   -0.011594    0.353399    0.219642    31.00000    0.10520    0.05117 =
         0.06462   -0.01384    0.03198   -0.03305
AFIX  23
H9A1  2   -0.021297    0.393731    0.277545    31.00000   -1.20000
H9A2  2    0.094426    0.297127    0.226488    31.00000   -1.20000
AFIX   0
C10A  1   -0.174427    0.258621    0.180831    31.00000    0.05465    0.04600 =
         0.05326    0.00761   -0.00104   -0.01064
AFIX  23
H10A  2   -0.277118    0.319051    0.167517    31.00000   -1.20000
H10B  2   -0.158202    0.213190    0.125365    31.00000   -1.20000
AFIX   0
C11A  1   -0.198815    0.147175    0.246730    31.00000    0.08057    0.06362 =
         0.06697    0.01181    0.00206   -0.03383
AFIX 137
H11A  2   -0.090467    0.098680    0.267812    31.00000   -1.50000
H11B  2   -0.284053    0.078738    0.218673    31.00000   -1.50000
H11C  2   -0.237798    0.191567    0.296598    31.00000   -1.50000
PART 2
AFIX   0
C5B   1    0.305152    0.505887    0.154460   -21.00000    0.05796    0.04245 =
         0.04482   -0.00064    0.01617    0.01252
AFIX  23
H5B1  2    0.351427    0.448394    0.207054   -21.00000   -1.20000
H5B2  2    0.273725    0.439380    0.104621   -21.00000   -1.20000
AFIX   0
C6B   1    0.432147    0.584997    0.137327   -21.00000    0.05160    0.05086 =
         0.05634   -0.00782    0.00687    0.00703
AFIX  23
H6B1  2    0.407602    0.680755    0.157309   -21.00000   -1.20000
H6B2  2    0.533434    0.551939    0.179643   -21.00000   -1.20000
AFIX   0
C7B   1    0.488122    0.606307    0.063641   -21.00000    0.05426    0.09515 =
         0.06122    0.01638    0.01114    0.02527
AFIX 137
H7B1  2    0.595864    0.555804    0.066089   -21.00000   -1.50000
H7B2  2    0.506311    0.707547    0.056260   -21.00000   -1.50000
H7B3  2    0.403849    0.571431    0.013734   -21.00000   -1.50000
AFIX   0
C9B   1   -0.011594    0.353399    0.219642   -31.00000    0.10520    0.05117 =
         0.06462   -0.01384    0.03198   -0.03305
AFIX  23
H9B1  2    0.107860    0.320337    0.234689   -31.00000   -1.20000
H9B2  2   -0.035393    0.400984    0.273001   -31.00000   -1.20000
AFIX   0
C10B  1   -0.116131    0.226171    0.209155   -31.00000    0.06295    0.05258 =
         0.06915    0.00789   -0.00590   -0.00332
AFIX  23
H10C  2   -0.078532    0.159928    0.258558   -31.00000   -1.20000
H10D  2   -0.109648    0.177845    0.153122   -31.00000   -1.20000
AFIX   0
C11B  1   -0.293245    0.277206    0.208904   -31.00000    0.08229    0.08573 =
         0.10646    0.02257    0.02634   -0.00540
AFIX 137
H11D  2   -0.290301    0.350975    0.253601   -31.00000   -1.50000
H11E  2   -0.363475    0.198322    0.222210   -31.00000   -1.50000
H11F  2   -0.341978    0.315751    0.150736   -31.00000   -1.50000
HKLF 4
 
REM  tbp32 in P2(1)
REM R1 =  0.0461 for   4402 Fo > 4sig(Fo)  and  0.0535 for all   5006 data
REM    308 parameters refined using      1 restraints
 
END  
     
WGHT      0.0730      0.1055 
REM Highest difference peak  0.190,  deepest hole -0.250,  1-sigma level  0.036
Q1    1   0.1736  0.9046  0.4199  11.00000  0.05    0.19
Q2    1  -0.0244  0.7397  0.4081  11.00000  0.05    0.18
Q3    1   0.1289  0.7758  0.4155  11.00000  0.05    0.15
Q4    1   0.2118  0.3817  0.0265  11.00000  0.05    0.15
Q5    1   0.0565  0.5251  0.1628  11.00000  0.05    0.14
;
 
loop_ 
 _atom_site_label 
 _atom_site_type_symbol 
 _atom_site_fract_x 
 _atom_site_fract_y 
 _atom_site_fract_z 
 _atom_site_U_iso_or_equiv 
 _atom_site_adp_type 
 _atom_site_occupancy 
 _atom_site_symmetry_multiplicity 
 _atom_site_calc_flag 
 _atom_site_refinement_flags 
 _atom_site_disorder_assembly 
 _atom_site_disorder_group 
O1 O 0.18846(18) 0.81547(13) 0.14629(8) 0.0404(3) Uani 1 1 d . . . 
O2 O 0.0264(2) 0.69691(16) 0.03445(8) 0.0488(4) Uani 1 1 d . . . 
O3 O 0.29442(17) 0.58384(14) 0.31987(8) 0.0425(3) Uani 1 1 d . . . 
O4 O -0.1601(2) 0.76284(19) 0.17974(10) 0.0575(4) Uani 1 1 d . . . 
N1 N 0.04046(19) 0.69007(16) 0.30247(9) 0.0325(3) Uani 1 1 d . . . 
N2 N -0.1958(2) 0.7942(2) 0.32311(13) 0.0558(5) Uani 1 1 d . . . 
C1 C 0.2753(4) 1.0555(3) 0.14176(17) 0.0689(8) Uani 1 1 d . . . 
H1A H 0.2323 1.0724 0.1961 0.103 Uiso 1 1 calc R . . 
H1B H 0.2648 1.1421 0.1065 0.103 Uiso 1 1 calc R . . 
H1C H 0.3953 1.0274 0.1566 0.103 Uiso 1 1 calc R . . 
C2 C 0.1744(3) 0.9408(2) 0.09037(14) 0.0526(6) Uani 1 1 d . . . 
H2A H 0.0536 0.9695 0.0731 0.063 Uiso 1 1 calc R . . 
H2B H 0.2192 0.9206 0.0362 0.063 Uiso 1 1 calc R . . 
C3 C 0.1034(2) 0.7015(2) 0.10908(11) 0.0367(4) Uani 1 1 d . B . 
C4 C 0.1359(2) 0.57487(19) 0.17107(11) 0.0346(4) Uani 1 1 d . . . 
C8 C -0.0132(3) 0.4687(2) 0.15177(14) 0.0486(5) Uani 1 1 d . B . 
H8A H -0.1214 0.5217 0.1465 0.058 Uiso 1 1 calc R A 1 
H8B H -0.0124 0.4239 0.0940 0.058 Uiso 1 1 calc R A 1 
C12 C 0.1661(2) 0.61926(17) 0.26858(11) 0.0307(4) Uani 1 1 d . B . 
C13 C -0.1132(2) 0.7508(2) 0.25914(14) 0.0430(4) Uani 1 1 d . . . 
C14 C -0.3768(3) 0.8322(5) 0.3012(2) 0.0965(12) Uani 1 1 d . . . 
H14A H -0.4107 0.8443 0.2373 0.145 Uiso 1 1 calc R . . 
H14B H -0.3954 0.9207 0.3307 0.145 Uiso 1 1 calc R . . 
H14C H -0.4450 0.7570 0.3208 0.145 Uiso 1 1 calc R . . 
C15 C -0.1196(3) 0.7414(3) 0.40968(14) 0.0498(5) Uani 1 1 d . . . 
H15 H -0.1759 0.6503 0.4200 0.060 Uiso 1 1 calc R . . 
C16 C -0.1367(3) 0.8436(3) 0.48335(18) 0.0672(8) Uani 1 1 d . . . 
H16A H -0.0864 0.9347 0.4725 0.101 Uiso 1 1 calc R . . 
H16B H -0.0773 0.8053 0.5398 0.101 Uiso 1 1 calc R . . 
H16C H -0.2575 0.8567 0.4853 0.101 Uiso 1 1 calc R . . 
C17 C 0.0647(2) 0.71034(19) 0.39820(11) 0.0358(4) Uani 1 1 d . . . 
H17 H 0.1033 0.6194 0.4283 0.043 Uiso 1 1 calc R . . 
C18 C 0.1934(2) 0.82483(18) 0.43201(10) 0.0307(4) Uani 1 1 d . . . 
C19 C 0.2211(2) 0.93973(19) 0.38094(12) 0.0350(4) Uani 1 1 d . . . 
H19 H 0.1608 0.9471 0.3219 0.042 Uiso 1 1 calc R . . 
C20 C 0.3366(3) 1.0442(2) 0.41573(14) 0.0413(4) Uani 1 1 d . . . 
H20 H 0.3537 1.1232 0.3805 0.050 Uiso 1 1 calc R . . 
C21 C 0.4268(2) 1.0341(2) 0.50124(14) 0.0428(5) Uani 1 1 d . . . 
H21 H 0.5064 1.1053 0.5245 0.051 Uiso 1 1 calc R . . 
C22 C 0.4005(3) 0.9199(2) 0.55270(13) 0.0430(5) Uani 1 1 d . . . 
H22 H 0.4617 0.9127 0.6115 0.052 Uiso 1 1 calc R . . 
C23 C 0.2850(2) 0.8163(2) 0.51849(11) 0.0379(4) Uani 1 1 d . . . 
H23 H 0.2676 0.7381 0.5542 0.045 Uiso 1 1 calc R . . 
C5A C 0.3052(3) 0.5059(2) 0.15446(14) 0.0476(5) Uani 0.777(7) 1 d P B 1 
H5A1 H 0.3996 0.5726 0.1752 0.057 Uiso 0.777(7) 1 calc PR B 1 
H5A2 H 0.3270 0.4201 0.1914 0.057 Uiso 0.777(7) 1 calc PR B 1 
C6A C 0.3112(4) 0.4665(4) 0.06342(19) 0.0582(10) Uani 0.777(7) 1 d P B 1 
H6A1 H 0.3245 0.3626 0.0633 0.070 Uiso 0.777(7) 1 calc PR B 1 
H6A2 H 0.1967 0.4869 0.0284 0.070 Uiso 0.777(7) 1 calc PR B 1 
C7A C 0.4208(9) 0.5171(8) 0.0182(3) 0.110(2) Uani 0.777(7) 1 d P B 1 
H7A1 H 0.4418 0.6170 0.0327 0.165 Uiso 0.777(7) 1 calc PR B 1 
H7A2 H 0.3745 0.5076 -0.0450 0.165 Uiso 0.777(7) 1 calc PR B 1 
H7A3 H 0.5280 0.4646 0.0330 0.165 Uiso 0.777(7) 1 calc PR B 1 
C9A C -0.0116(4) 0.3534(3) 0.21964(18) 0.0716(8) Uani 0.516(9) 1 d P B 1 
H9A1 H -0.0213 0.3937 0.2775 0.086 Uiso 0.516(9) 1 calc PR B 1 
H9A2 H 0.0944 0.2971 0.2265 0.086 Uiso 0.516(9) 1 calc PR B 1 
C10A C -0.1744(9) 0.2586(7) 0.1808(4) 0.0528(16) Uani 0.516(9) 1 d P B 1 
H10A H -0.2771 0.3191 0.1675 0.063 Uiso 0.516(9) 1 calc PR B 1 
H10B H -0.1582 0.2132 0.1254 0.063 Uiso 0.516(9) 1 calc PR B 1 
C11A C -0.1988(8) 0.1472(6) 0.2467(4) 0.072(2) Uani 0.516(9) 1 d P B 1 
H11A H -0.0905 0.0987 0.2678 0.108 Uiso 0.516(9) 1 calc PR B 1 
H11B H -0.2841 0.0787 0.2187 0.108 Uiso 0.516(9) 1 calc PR B 1 
H11C H -0.2378 0.1916 0.2966 0.108 Uiso 0.516(9) 1 calc PR B 1 
C5B C 0.3052(3) 0.5059(2) 0.15446(14) 0.0476(5) Uani 0.223(7) 1 d P B 2 
H5B1 H 0.3514 0.4484 0.2071 0.057 Uiso 0.223(7) 1 calc PR B 2 
H5B2 H 0.2737 0.4394 0.1046 0.057 Uiso 0.223(7) 1 calc PR B 2 
C6B C 0.4321(13) 0.5850(12) 0.1373(7) 0.053(3) Uani 0.223(7) 1 d P B 2 
H6B1 H 0.4076 0.6808 0.1573 0.064 Uiso 0.223(7) 1 calc PR B 2 
H6B2 H 0.5334 0.5519 0.1796 0.064 Uiso 0.223(7) 1 calc PR B 2 
C7B C 0.4881(16) 0.6063(19) 0.0636(10) 0.070(4) Uani 0.223(7) 1 d P B 2 
H7B1 H 0.5959 0.5558 0.0661 0.105 Uiso 0.223(7) 1 calc PR B 2 
H7B2 H 0.5063 0.7075 0.0563 0.105 Uiso 0.223(7) 1 calc PR B 2 
H7B3 H 0.4038 0.5714 0.0137 0.105 Uiso 0.223(7) 1 calc PR B 2 
C9B C -0.0116(4) 0.3534(3) 0.21964(18) 0.0716(8) Uani 0.484(9) 1 d P B 2 
H9B1 H 0.1079 0.3203 0.2347 0.086 Uiso 0.484(9) 1 calc PR B 2 
H9B2 H -0.0354 0.4010 0.2730 0.086 Uiso 0.484(9) 1 calc PR B 2 
C10B C -0.1161(11) 0.2262(8) 0.2092(6) 0.064(2) Uani 0.484(9) 1 d P B 2 
H10C H -0.0785 0.1599 0.2586 0.077 Uiso 0.484(9) 1 calc PR B 2 
H10D H -0.1096 0.1778 0.1531 0.077 Uiso 0.484(9) 1 calc PR B 2 
C11B C -0.2932(10) 0.2772(9) 0.2089(5) 0.090(3) Uani 0.484(9) 1 d P B 2 
H11D H -0.2903 0.3510 0.2536 0.136 Uiso 0.484(9) 1 calc PR B 2 
H11E H -0.3635 0.1983 0.2222 0.136 Uiso 0.484(9) 1 calc PR B 2 
H11F H -0.3420 0.3158 0.1507 0.136 Uiso 0.484(9) 1 calc PR B 2 
 
loop_ 
 _atom_site_aniso_label 
 _atom_site_aniso_U_11 
 _atom_site_aniso_U_22 
 _atom_site_aniso_U_33 
 _atom_site_aniso_U_23 
 _atom_site_aniso_U_13 
 _atom_site_aniso_U_12 
O1 0.0534(8) 0.0353(7) 0.0279(6) 0.0036(5) -0.0038(5) -0.0012(6) 
O2 0.0610(9) 0.0515(8) 0.0283(6) -0.0029(6) -0.0057(6) 0.0009(7) 
O3 0.0465(8) 0.0453(7) 0.0313(7) -0.0003(6) -0.0035(5) 0.0135(6) 
O4 0.0408(8) 0.0765(11) 0.0481(8) -0.0080(8) -0.0091(6) 0.0155(8) 
N1 0.0333(8) 0.0353(7) 0.0279(7) -0.0039(6) 0.0037(5) -0.0013(6) 
N2 0.0302(8) 0.0752(13) 0.0624(11) -0.0226(10) 0.0100(8) 0.0009(8) 
C1 0.104(2) 0.0440(12) 0.0544(15) 0.0097(11) 0.0049(14) -0.0136(13) 
C2 0.0766(16) 0.0408(11) 0.0358(10) 0.0118(8) -0.0006(10) 0.0007(10) 
C3 0.0422(10) 0.0392(9) 0.0265(8) -0.0024(7) 0.0009(7) 0.0036(8) 
C4 0.0404(10) 0.0342(9) 0.0277(8) -0.0040(7) 0.0031(7) -0.0005(7) 
C8 0.0586(13) 0.0461(11) 0.0403(11) -0.0159(9) 0.0077(9) -0.0140(10) 
C12 0.0345(9) 0.0271(8) 0.0294(8) -0.0009(6) 0.0030(7) 0.0008(7) 
C13 0.0312(9) 0.0470(10) 0.0487(11) -0.0130(9) 0.0017(8) 0.0012(8) 
C14 0.0359(13) 0.146(3) 0.106(2) -0.041(2) 0.0101(14) 0.0178(17) 
C15 0.0464(11) 0.0569(12) 0.0513(12) -0.0202(10) 0.0225(9) -0.0225(10) 
C16 0.0545(14) 0.0836(18) 0.0722(15) -0.0387(14) 0.0343(12) -0.0209(13) 
C17 0.0468(10) 0.0323(9) 0.0297(8) -0.0037(7) 0.0110(7) -0.0071(8) 
C18 0.0308(8) 0.0343(9) 0.0273(8) -0.0056(7) 0.0067(6) -0.0005(7) 
C19 0.0350(9) 0.0404(9) 0.0295(8) -0.0018(7) 0.0060(7) -0.0037(8) 
C20 0.0405(10) 0.0403(10) 0.0451(11) -0.0038(8) 0.0133(8) -0.0098(8) 
C21 0.0318(9) 0.0480(11) 0.0483(11) -0.0170(9) 0.0072(8) -0.0098(8) 
C22 0.0382(10) 0.0528(11) 0.0355(10) -0.0115(9) 0.0005(8) 0.0034(8) 
C23 0.0460(11) 0.0376(9) 0.0289(8) 0.0006(7) 0.0043(7) 0.0038(8) 
C5A 0.0580(13) 0.0424(10) 0.0448(11) -0.0006(9) 0.0162(10) 0.0125(9) 
C6A 0.071(2) 0.0641(19) 0.0408(15) 0.0016(13) 0.0148(14) 0.0308(16) 
C7A 0.129(5) 0.148(6) 0.068(3) 0.023(3) 0.058(3) 0.052(4) 
C9A 0.105(2) 0.0512(14) 0.0646(15) -0.0138(12) 0.0320(14) -0.0330(14) 
C10A 0.055(4) 0.046(3) 0.053(3) 0.008(2) -0.001(3) -0.011(3) 
C11A 0.081(4) 0.064(3) 0.067(3) 0.012(3) 0.002(3) -0.034(3) 
C5B 0.0580(13) 0.0424(10) 0.0448(11) -0.0006(9) 0.0162(10) 0.0125(9) 
C6B 0.052(6) 0.051(6) 0.056(6) -0.008(5) 0.007(4) 0.007(5) 
C7B 0.054(7) 0.095(10) 0.061(8) 0.016(7) 0.011(6) 0.025(7) 
C9B 0.105(2) 0.0512(14) 0.0646(15) -0.0138(12) 0.0320(14) -0.0330(14) 
C10B 0.063(5) 0.053(4) 0.069(5) 0.008(3) -0.006(3) -0.003(3) 
C11B 0.082(5) 0.086(5) 0.106(6) 0.023(4) 0.026(4) -0.005(4) 
 
_geom_special_details 
; 
 All esds (except the esd in the dihedral angle between two l.s. planes) 
 are estimated using the full covariance matrix.  The cell esds are taken 
 into account individually in the estimation of esds in distances, angles 
 and torsion angles; correlations between esds in cell parameters are only 
 used when they are defined by crystal symmetry.  An approximate (isotropic) 
 treatment of cell esds is used for estimating esds involving l.s. planes. 
; 
 
loop_ 
 _geom_bond_atom_site_label_1 
 _geom_bond_atom_site_label_2 
 _geom_bond_distance 
 _geom_bond_site_symmetry_2 
 _geom_bond_publ_flag 
O1 C3 1.345(2) . ? 
O1 C2 1.460(2) . ? 
O2 C3 1.201(2) . ? 
O3 C12 1.218(2) . ? 
O4 C13 1.219(2) . ? 
N1 C12 1.391(2) . ? 
N1 C13 1.406(2) . ? 
N1 C17 1.468(2) . ? 
N2 C13 1.354(3) . ? 
N2 C15 1.450(3) . ? 
N2 C14 1.467(3) . ? 
C1 C2 1.490(3) . ? 
C1 H1A 0.9800 . ? 
C1 H1B 0.9800 . ? 
C1 H1C 0.9800 . ? 
C2 H2A 0.9900 . ? 
C2 H2B 0.9900 . ? 
C3 C4 1.527(3) . ? 
C4 C12 1.539(2) . ? 
C4 C8 1.545(3) . ? 
C4 C5A 1.568(3) . ? 
C8 C9A 1.513(3) . ? 
C8 H8A 0.9900 . ? 
C8 H8B 0.9900 . ? 
C14 H14A 0.9800 . ? 
C14 H14B 0.9800 . ? 
C14 H14C 0.9800 . ? 
C15 C16 1.521(3) . ? 
C15 C17 1.546(3) . ? 
C15 H15 1.0000 . ? 
C16 H16A 0.9800 . ? 
C16 H16B 0.9800 . ? 
C16 H16C 0.9800 . ? 
C17 C18 1.518(2) . ? 
C17 H17 1.0000 . ? 
C18 C19 1.387(3) . ? 
C18 C23 1.399(2) . ? 
C19 C20 1.390(3) . ? 
C19 H19 0.9500 . ? 
C20 C21 1.383(3) . ? 
C20 H20 0.9500 . ? 
C21 C22 1.382(3) . ? 
C21 H21 0.9500 . ? 
C22 C23 1.382(3) . ? 
C22 H22 0.9500 . ? 
C23 H23 0.9500 . ? 
C5A C6A 1.466(3) . ? 
C5A H5A1 0.9900 . ? 
C5A H5A2 0.9900 . ? 
C6A C7A 1.313(7) . ? 
C6A H6A1 0.9900 . ? 
C6A H6A2 0.9900 . ? 
C7A H7A1 0.9800 . ? 
C7A H7A2 0.9800 . ? 
C7A H7A3 0.9800 . ? 
C9A C10A 1.601(6) . ? 
C9A H9A1 0.9900 . ? 
C9A H9A2 0.9900 . ? 
C10A C11A 1.506(8) . ? 
C10A H10A 0.9900 . ? 
C10A H10B 0.9900 . ? 
C11A H11A 0.9800 . ? 
C11A H11B 0.9800 . ? 
C11A H11C 0.9800 . ? 
C6B C7B 1.317(17) . ? 
C6B H6B1 0.9900 . ? 
C6B H6B2 0.9900 . ? 
C7B H7B1 0.9800 . ? 
C7B H7B2 0.9800 . ? 
C7B H7B3 0.9800 . ? 
C10B C11B 1.496(12) . ? 
C10B H10C 0.9900 . ? 
C10B H10D 0.9900 . ? 
C11B H11D 0.9800 . ? 
C11B H11E 0.9800 . ? 
C11B H11F 0.9800 . ? 
 
loop_ 
 _geom_angle_atom_site_label_1 
 _geom_angle_atom_site_label_2 
 _geom_angle_atom_site_label_3 
 _geom_angle 
 _geom_angle_site_symmetry_1 
 _geom_angle_site_symmetry_3 
 _geom_angle_publ_flag 
C3 O1 C2 115.07(14) . . ? 
C12 N1 C13 130.27(15) . . ? 
C12 N1 C17 118.48(14) . . ? 
C13 N1 C17 111.24(15) . . ? 
C13 N2 C15 113.07(18) . . ? 
C13 N2 C14 120.2(2) . . ? 
C15 N2 C14 121.4(2) . . ? 
C2 C1 H1A 109.5 . . ? 
C2 C1 H1B 109.5 . . ? 
H1A C1 H1B 109.5 . . ? 
C2 C1 H1C 109.5 . . ? 
H1A C1 H1C 109.5 . . ? 
H1B C1 H1C 109.5 . . ? 
O1 C2 C1 107.73(17) . . ? 
O1 C2 H2A 110.2 . . ? 
C1 C2 H2A 110.2 . . ? 
O1 C2 H2B 110.2 . . ? 
C1 C2 H2B 110.2 . . ? 
H2A C2 H2B 108.5 . . ? 
O2 C3 O1 124.40(18) . . ? 
O2 C3 C4 124.71(18) . . ? 
O1 C3 C4 110.53(14) . . ? 
C3 C4 C12 112.11(15) . . ? 
C3 C4 C8 110.96(16) . . ? 
C12 C4 C8 109.76(15) . . ? 
C3 C4 C5A 105.88(15) . . ? 
C12 C4 C5A 107.17(15) . . ? 
C8 C4 C5A 110.84(17) . . ? 
C9A C8 C4 115.58(19) . . ? 
C9A C8 H8A 108.4 . . ? 
C4 C8 H8A 108.4 . . ? 
C9A C8 H8B 108.4 . . ? 
C4 C8 H8B 108.4 . . ? 
H8A C8 H8B 107.4 . . ? 
O3 C12 N1 117.83(15) . . ? 
O3 C12 C4 121.18(16) . . ? 
N1 C12 C4 120.73(14) . . ? 
O4 C13 N2 127.47(19) . . ? 
O4 C13 N1 126.26(18) . . ? 
N2 C13 N1 106.27(17) . . ? 
N2 C14 H14A 109.5 . . ? 
N2 C14 H14B 109.5 . . ? 
H14A C14 H14B 109.5 . . ? 
N2 C14 H14C 109.5 . . ? 
H14A C14 H14C 109.5 . . ? 
H14B C14 H14C 109.5 . . ? 
N2 C15 C16 112.9(2) . . ? 
N2 C15 C17 101.63(15) . . ? 
C16 C15 C17 115.52(17) . . ? 
N2 C15 H15 108.8 . . ? 
C16 C15 H15 108.8 . . ? 
C17 C15 H15 108.8 . . ? 
C15 C16 H16A 109.5 . . ? 
C15 C16 H16B 109.5 . . ? 
H16A C16 H16B 109.5 . . ? 
C15 C16 H16C 109.5 . . ? 
H16A C16 H16C 109.5 . . ? 
H16B C16 H16C 109.5 . . ? 
N1 C17 C18 113.02(14) . . ? 
N1 C17 C15 101.25(15) . . ? 
C18 C17 C15 115.05(15) . . ? 
N1 C17 H17 109.1 . . ? 
C18 C17 H17 109.1 . . ? 
C15 C17 H17 109.1 . . ? 
C19 C18 C23 118.57(16) . . ? 
C19 C18 C17 122.41(15) . . ? 
C23 C18 C17 119.00(16) . . ? 
C18 C19 C20 120.32(17) . . ? 
C18 C19 H19 119.8 . . ? 
C20 C19 H19 119.8 . . ? 
C21 C20 C19 120.48(19) . . ? 
C21 C20 H20 119.8 . . ? 
C19 C20 H20 119.8 . . ? 
C22 C21 C20 119.70(18) . . ? 
C22 C21 H21 120.2 . . ? 
C20 C21 H21 120.2 . . ? 
C23 C22 C21 119.97(17) . . ? 
C23 C22 H22 120.0 . . ? 
C21 C22 H22 120.0 . . ? 
C22 C23 C18 120.96(18) . . ? 
C22 C23 H23 119.5 . . ? 
C18 C23 H23 119.5 . . ? 
C6A C5A C4 116.8(2) . . ? 
C6A C5A H5A1 108.1 . . ? 
C4 C5A H5A1 108.1 . . ? 
C6A C5A H5A2 108.1 . . ? 
C4 C5A H5A2 108.1 . . ? 
H5A1 C5A H5A2 107.3 . . ? 
C7A C6A C5A 124.5(5) . . ? 
C7A C6A H6A1 106.2 . . ? 
C5A C6A H6A1 106.2 . . ? 
C7A C6A H6A2 106.2 . . ? 
C5A C6A H6A2 106.2 . . ? 
H6A1 C6A H6A2 106.4 . . ? 
C8 C9A C10A 104.2(3) . . ? 
C8 C9A H9A1 110.9 . . ? 
C10A C9A H9A1 110.9 . . ? 
C8 C9A H9A2 110.9 . . ? 
C10A C9A H9A2 110.9 . . ? 
H9A1 C9A H9A2 108.9 . . ? 
C11A C10A C9A 109.9(5) . . ? 
C11A C10A H10A 109.7 . . ? 
C9A C10A H10A 109.7 . . ? 
C11A C10A H10B 109.7 . . ? 
C9A C10A H10B 109.7 . . ? 
H10A C10A H10B 108.2 . . ? 
C7B C6B H6B1 104.5 . . ? 
C7B C6B H6B2 104.5 . . ? 
H6B1 C6B H6B2 105.6 . . ? 
C6B C7B H7B1 109.5 . . ? 
C6B C7B H7B2 109.5 . . ? 
H7B1 C7B H7B2 109.5 . . ? 
C6B C7B H7B3 109.5 . . ? 
H7B1 C7B H7B3 109.5 . . ? 
H7B2 C7B H7B3 109.5 . . ? 
C11B C10B H10C 110.8 . . ? 
C11B C10B H10D 110.8 . . ? 
H10C C10B H10D 108.9 . . ? 
C10B C11B H11D 109.5 . . ? 
C10B C11B H11E 109.5 . . ? 
H11D C11B H11E 109.5 . . ? 
C10B C11B H11F 109.5 . . ? 
H11D C11B H11F 109.5 . . ? 
H11E C11B H11F 109.5 . . ? 
 
loop_ 
 _geom_torsion_atom_site_label_1 
 _geom_torsion_atom_site_label_2 
 _geom_torsion_atom_site_label_3 
 _geom_torsion_atom_site_label_4 
 _geom_torsion 
 _geom_torsion_site_symmetry_1 
 _geom_torsion_site_symmetry_2 
 _geom_torsion_site_symmetry_3 
 _geom_torsion_site_symmetry_4 
 _geom_torsion_publ_flag 
C3 O1 C2 C1 180.0(2) . . . . ? 
C2 O1 C3 O2 3.2(3) . . . . ? 
C2 O1 C3 C4 176.51(17) . . . . ? 
O2 C3 C4 C12 -155.48(18) . . . . ? 
O1 C3 C4 C12 31.2(2) . . . . ? 
O2 C3 C4 C8 -32.4(3) . . . . ? 
O1 C3 C4 C8 154.33(16) . . . . ? 
O2 C3 C4 C5A 88.0(2) . . . . ? 
O1 C3 C4 C5A -85.33(18) . . . . ? 
C3 C4 C8 C9A -168.80(19) . . . . ? 
C12 C4 C8 C9A -44.3(3) . . . . ? 
C5A C4 C8 C9A 73.8(2) . . . . ? 
C13 N1 C12 O3 175.31(18) . . . . ? 
C17 N1 C12 O3 -3.7(2) . . . . ? 
C13 N1 C12 C4 -10.4(3) . . . . ? 
C17 N1 C12 C4 170.57(15) . . . . ? 
C3 C4 C12 O3 -124.73(18) . . . . ? 
C8 C4 C12 O3 111.5(2) . . . . ? 
C5A C4 C12 O3 -9.0(2) . . . . ? 
C3 C4 C12 N1 61.2(2) . . . . ? 
C8 C4 C12 N1 -62.6(2) . . . . ? 
C5A C4 C12 N1 176.98(16) . . . . ? 
C15 N2 C13 O4 169.6(2) . . . . ? 
C14 N2 C13 O4 15.1(4) . . . . ? 
C15 N2 C13 N1 -11.2(2) . . . . ? 
C14 N2 C13 N1 -165.7(3) . . . . ? 
C12 N1 C13 O4 -6.5(3) . . . . ? 
C17 N1 C13 O4 172.5(2) . . . . ? 
C12 N1 C13 N2 174.23(18) . . . . ? 
C17 N1 C13 N2 -6.7(2) . . . . ? 
C13 N2 C15 C16 147.38(19) . . . . ? 
C14 N2 C15 C16 -58.5(3) . . . . ? 
C13 N2 C15 C17 23.0(2) . . . . ? 
C14 N2 C15 C17 177.2(3) . . . . ? 
C12 N1 C17 C18 75.4(2) . . . . ? 
C13 N1 C17 C18 -103.73(18) . . . . ? 
C12 N1 C17 C15 -160.94(15) . . . . ? 
C13 N1 C17 C15 19.9(2) . . . . ? 
N2 C15 C17 N1 -24.20(18) . . . . ? 
C16 C15 C17 N1 -146.8(2) . . . . ? 
N2 C15 C17 C18 98.02(18) . . . . ? 
C16 C15 C17 C18 -24.6(3) . . . . ? 
N1 C17 C18 C19 29.5(2) . . . . ? 
C15 C17 C18 C19 -86.1(2) . . . . ? 
N1 C17 C18 C23 -152.01(16) . . . . ? 
C15 C17 C18 C23 92.4(2) . . . . ? 
C23 C18 C19 C20 -0.5(3) . . . . ? 
C17 C18 C19 C20 177.98(17) . . . . ? 
C18 C19 C20 C21 0.8(3) . . . . ? 
C19 C20 C21 C22 -0.7(3) . . . . ? 
C20 C21 C22 C23 0.3(3) . . . . ? 
C21 C22 C23 C18 0.0(3) . . . . ? 
C19 C18 C23 C22 0.1(3) . . . . ? 
C17 C18 C23 C22 -178.42(18) . . . . ? 
C3 C4 C5A C6A -54.9(3) . . . . ? 
C12 C4 C5A C6A -174.8(2) . . . . ? 
C8 C4 C5A C6A 65.5(3) . . . . ? 
C4 C5A C6A C7A 119.7(4) . . . . ? 
C4 C8 C9A C10A -178.1(3) . . . . ? 
C8 C9A C10A C11A -174.3(5) . . . . ? 
 
_diffrn_measured_fraction_theta_max    0.996 
_diffrn_reflns_theta_full              27.10 
_diffrn_measured_fraction_theta_full   0.996 
_refine_diff_density_max    0.190 
_refine_diff_density_min   -0.250 
_refine_diff_density_rms    0.036 
